# Supplementary material for: Structure of hyperthermophilic β-glucosidase from Pyrococcus furiosus
Source: PubMed Central journal article supplement (PMC3232120; doi:10.1107/s1744309111035238), 2011-11-25
Supplement: f-67-01473-sup1.pdf [file f-67-01473-sup1.pdf]

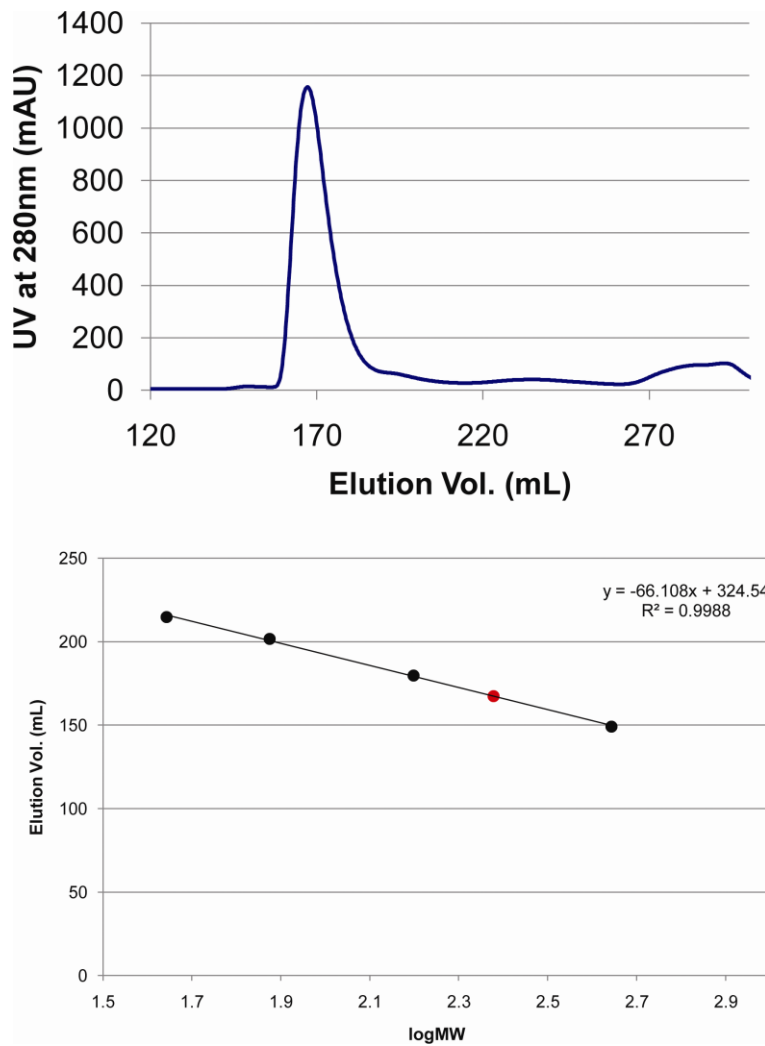

**Supplemental Figure 1** (a) Gel filtration of BGLPf on Hi-Load 26/60 Superdex 200 pg. Gel filtration of BGLPf gave a single peak. (b) Gel filtration of calibration on Hi-Load 26/60 Superdex 200 pg. Standard proteins (ovalbumin, conalbumin, aldolase and ferritin) and BGLPf are shown by black and red plots, respectively. Molecular weight of BGLPf was estimated to be 238.8 kDa.
